1  
2 **Oxford Nanopore sequencing in a research-based**  
3 **undergraduate course**

4  
5 YI ZENG<sup>1</sup>, CHRISTOPHER H. MARTIN<sup>1</sup>

6 *<sup>1</sup>Department of Biology, University of North Carolina at Chapel Hill, NC, USA*

7  
8  
9  
10  
11  
12  
13  
14  
15  
16  
17  
18  
19

20 Running Title: Nanopore sequencing

21 Key words: education, third-gen sequencing, long-read sequencing, pupfish, genomics

22 Correspondence: Christopher H Martin. Department of Biology, University of North Carolina at  
23 Chapel Hill, Campus Box 3280, 120 South Rd., NC, 27599, USA

24 Emails: [zengyi@email.unc.edu](mailto:zengyi@email.unc.edu); [chmartin@unc.edu](mailto:chmartin@unc.edu)

25 Data accessibility: All datasets used for this study will be deposited in Dryad.

26 Word count abstract: 246 words; Word count main text: 3533, Figures 1, S1; Table 1

27 **Abstract**

28

29 *Background:*

30 Nanopore sequencing is a third generation genomic sequencing method that offers real time  
31 sequencing of DNA samples. Nanopore sequencing is an excellent tool for teaching because it  
32 involves cutting-edge sequencing methods and also helps students to develop a research mindset,  
33 where students can learn to identify and resolve problems that arise during an experiment.

34 *Results:*

35 We, as a group of undergraduate biology students, were able to use nanopore sequencing to  
36 analyze a sample of pupfish DNA. We were able to accomplish this without computer science  
37 backgrounds and only some basic DNA extraction training. Although there were issues, such as  
38 inconsistent results across runs, we found it useful as a research learning experience and an  
39 application of the skills we learned.

40 *Conclusions:*

41 As students, it was exciting to be able to experience this technology first hand and apply what we  
42 learned in the classroom. Nanopore sequencing holds potential for DNA sequencing of large  
43 fragments in real time. It allows students to be acquainted with novel technologies and the  
44 theories behind them. However, as with all new techniques, it does not have the same established  
45 support, and when students run into difficulties while using nanopore sequencing, it is often  
46 difficult to identify what went wrong.

47

48

49

50

## 51 **Introduction**

52  
53 When I first decided to take a seafood mislabeling class I didn't expect to be able to test  
54 developing third-generation DNA sequencing technology or learn about unique evolutionary  
55 adaptations from two new species of pupfish from the Bahamas. My course was aimed towards  
56 giving undergraduate biology majors a chance to get hands on experience in a research  
57 environment. Oxford nanopore sequencing can be applied in a much broader biological context  
58 and even dips into computer programming. So, what exactly is nanopore sequencing and why is  
59 it important?

60 DNA sequencing has come a long way from traditional Sanger sequencing. Although  
61 Sanger sequencing is still considered the gold standard for accuracy, it requires gel  
62 electrophoresis and the use of ddNTPs to identify the sequences of amplified segments of DNA  
63 (Obenrader 2003). Sanger sequencing is incredibly accurate but requires lots of processing and  
64 thus the cost of sequencing DNA of even relatively short fragments is very high (Goodwin 2016).  
65 Next generation sequencing which replaced traditional methods drastically reduced prices of  
66 whole genome sequencing (Goodwin 2016). Although these methods made DNA sequencing  
67 more accessible, they are generally less accurate (99%) than methods such as Sanger sequencing  
68 which can have accuracies as high as 99.999% (Shendure 2008; Morozova 2008). Another major  
69 constraint in next generation, or second generation, sequencing is the short read length (50 – 250  
70 bp on Illumina platforms) which makes genome assembly and alignment very difficult (Goodwin  
71 2016).

72 We are currently approaching the third generation of genomic sequencing which builds  
73 further upon the advancements of second generation sequencing. Third generation sequencing  
74 addresses the main weakness of second generation sequencing because many platforms can

75 produce reads over 10 kb to even 100 kb or more (Lee 2016). Third generation sequencing does  
76 not require PCR amplification as previous generations have. Due to the read lengths and high  
77 accuracies, the current third generation sequencing technologies, Pacific Biosciences (PacBio)  
78 Single Molecule Real Time (SMRT) sequencing, Illumina Tru-seq Synthetic Long-Read  
79 technology, and Oxford Nanopore Technologies sequencing have been able to fill in previous  
80 gaps in genomes (Lee 2016). Of the three, Illumina Tru-Seq Synthetic Long Reads is considered  
81 to be the most accurate but has much shorter read lengths, requires more DNA, and is more  
82 expensive (Lee 2016). PacBio's SMRT and Oxford Nanopore Technologies sequencing  
83 techniques both have high raw error rates, but with certain algorithm techniques both methods  
84 can greatly increase their accuracy to almost 99.999% (Lee 2016). The most recent of third  
85 generation technologies, Oxford Nanopore Technologies, is greatly limited in the accuracy of  
86 their reads in comparison to other third generation techniques but its strength is in its portability.  
87 Oxford Nanopore Technologies' MinION is a device slightly larger than a USB drive that can be  
88 plugged into any modern laptop to provide real-time data. Currently in development is an even  
89 more portable version that can be run on a smartphone called the SmidgION.

90 Nanopore sequencing is a third-generation genomic sequencing technique that was only  
91 recently commercialized in 2014. The nanopore is a protein with a pore that is only a nanometer  
92 wide (Clarke 2009). This tiny pore only allows single molecules such as individual DNA strands  
93 to pass through one at a time. These nanopores are embedded into a sheet that has a current  
94 applied through it. The current is extremely sensitive to the molecules that pass through it as  
95 each nucleotide creates a unique change in the resistance of the nanopore which allows  
96 individual nucleotides to be identified individually as they pass through (Deamer 2016).  
97 Nanopore sequencing can read DNA sequences more than 100 kb long and the entire run

98 completes within 48 hours. This potentially makes it a low-cost method to sequence genomes, as  
99 each kit (including the USB MinION sequencing machine) costs \$1,000 for two samples (Meller  
100 2000). Although currently nanopore sequencing is not as accurate in comparison to other third-  
101 generation sequencing techniques, what makes this developing technology so exciting is that it  
102 offers a possible tool in the future to sequence entire genomes on any lab bench. In fact, it has  
103 already proven to be useful in the identification and genome sequencing of diseases in the field,  
104 such as Ebola virus (Quick 2016; Schmidt 2017). However, as the newest of the third-generation  
105 sequencing technologies, nanopore technologies are continuing to rapidly improve as more  
106 accurate and robust nanopores are being developed (Oxford Nanopore Technologies 2017).

107 Not much has been done in a classroom setting exploring nanopore sequencing or the  
108 techniques involved and thus it is a unique opportunity for undergraduates to explore developing  
109 technologies. The portability and ease of preparation makes nanopore sequencing ideal in a  
110 classroom, because all that students need to analyze data obtained from prepared samples is a  
111 working laptop. Previously, only one upper-level class has been well documented which focused  
112 on the analysis of DNA sequences produced from nanopore sequencing to identify unknown  
113 samples, as well as unknown human DNA (Zaaijer 2016). However, the students did not actually  
114 extract the DNA or prepare the sequencing libraries. Analyzing human DNA also presents  
115 ethical concerns and falls under institutional review board policies. However, the application of  
116 nanopore sequencing can be developed further by teaching many basic laboratory techniques  
117 such as proper pipetting and DNA extraction which are necessary to prepare samples. Thus,  
118 nanopore sequencing can be used for *de novo* assemblies in the classroom and to introduce  
119 students to important laboratory skills and exciting developments in genomic sequencing.

120 We chose the nanopore sequencing project as our independent research project topic  
121 because of its novelty as a portable option for genomic sequencing. We sequenced a sample of  
122 muscle tissue from the molluscivore pupfish, *Cyprinodon brontotheroides*, a species of pupfish  
123 endemic to San Salvador Island in the Bahamas (Box 1). The genomes of other species of pupfish  
124 have already been sequenced so we would also be able to test whether the DNA sequences we

#### Box 1: Novelty in Caribbean pupfishes

A young, sympatric radiation of pupfishes is endemic to a single Bahamian island despite widespread gene flow and ecological opportunity across the Caribbean (Richards and Martin 2017; Martin 2016a,b; Martin and Wainwright 2011). This 10 kya radiation contains two novel trophic specialists: a scale-eating pupfish and a molluscivore pupfish in addition to a generalist, unique niches among Cyprinodontiform fishes (Martin and Wainwright 2013a,b; McGirr and Martin 2017; Martin et al. 2016). This paradox enables a rare glimpse at the microevolutionary origins of macroevolution-scale novelty: why did novel trophic specialists evolve on only one island across the Caribbean? This is the central question of my research program: predicting the origins of novelty. **Systems like this are rare because the origins of novel adaptations are rare, but enable the chance to study the evolution of novelty in action, rather than millions of years after the fact.**

125 got from nanopore sequencing were accurate enough to identify the pupfish sample. Our goal  
126 was to use nanopore sequencing to sequence the pupfish genomic DNA and compare the  
127 sequence with known data using the Basic Local Alignment Search Tool (BLAST) by the  
128 National Center for Biotechnology Information, both as a test to see the accuracy of nanopore

129 sequencing and to see if we, as undergraduates with very little training beforehand, could even  
130 successfully use nanopore sequencing.

131

132

## 133 **Results**

134 We found that it was entirely possible for undergraduate biology students to run nanopore  
135 sequencing. From our successful run we generated a massive amount of raw DNA sequences  
136 ranging from smaller segments to our longest read of 170 kb (see Table 1).

137 We ran a total of three experiments. We recorded the number of active nanopores before  
138 conducting each experiment (Table 2). We conducted the quality control experiment using  
139 Lambda DNA provided as suggested on the first flow cell before using sample DNA. Our second  
140 experimental run using extracted pupfish DNA was successful and the results are reported in  
141 Figure 2 and 3.

142 Metrichor has an application called What's in my pot (WIMP) that is intended as the  
143 analytical component of nanopore sequencing. Currently WIMP can identify bacteria and other  
144 unicellular organisms by comparing sequences generated by runs with known genomic  
145 sequences and Oxford Nanopore is working to include support for multicellular organisms in the  
146 future. WIMP identified *Mycobacterium rhodesiae* and *Delftia* with high classification scores  
147 indicating Metrichor's level of confidence in the identification of the species similar to e-values  
148 used by NCBI's BLAST. Of the two bacteria identified *Mycobacterium rhodesiae*, which had the  
149 highest classification score, was very interesting as the pupfish population from which the  
150 sample was taken from was contaminated with a mycobacterium infection relatively recently.

151

| Sample | Organisim                                                                                                               | E-Value |
|--------|-------------------------------------------------------------------------------------------------------------------------|---------|
| 1      | No Match                                                                                                                | N/A     |
| 2      | Tetraodon nigroviridis transposon Titof2_Tet                                                                            | 0.0     |
| 3      | No Match                                                                                                                | N/A     |
| 4      | PREDICTED: Poecilia reticulata spectrin beta chain, non-erythrocytic 4-like (LOC103476183), transcript variant XD, mRNA | 1.7     |
| 5      | N/A                                                                                                                     | N/A     |
| 6      | Populus trichocarpa clone POP002-A07, complete sequence                                                                 | 0.41    |
| 7      | PREDICTED: Zea mays auxin response factor 17 (LOC103629639), mRNA                                                       | 1.3     |
| 8      | Ralstonia insidiosa strain ATCC 49129 chromosome 1, complete sequence                                                   | 0.46    |
| 9      | Syphacia muris genome assembly S_muris_Valencia ,scaffold SMUV_scaffold0001048                                          | 0.029   |
| 10     | Ustilago maydis 521 hypothetical protein partial mRNA                                                                   | 0.17    |

152 Table 3: Organisms identified from 10 random sequences. Sample 2 is of a transposon from the green  
153 spotted pufferfish. Sample 4 is a guppy, but has a very high e-value.

154  
155           Unfortunately, as WIMP does not currently have support for multicellular organisms we  
156 had to access the raw data from the run using HDFView-2.13.0 and compare individual  
157 sequences through BLAST (National Center for Biotechnology Information). From ten  
158 individual sequences we chose at random gathered from BLAST green spotted pufferfish  
159 transposons were identified with high accuracy with an e-value of 0.0. Although these are not  
160 pupfish, the fish genome is highly conserved between species and the low accuracy of individual  
161 reads means that exact matches to the pupfish genome are rare. Furthermore, we analyzed one  
162 hundred sequences that passed MinKNOW's quality filter indicating the program's confidence in  
163 the accuracy of the nucleotides identified (See Appendix 1). Twenty four of the sequences  
164 matched a fish species within GenBank, indicating that approximately 24% of reads successfully  
165 came from our sample DNA.



166

## 167 **Discussion**

168 My fellow students expressed great interest in nanopore sequencing and took initiative to learn  
169 how to use the MinION. It was an opportunity to apply the basic techniques we learned in the  
170 class, such as DNA extraction, to nanopore sequencing. Although, as undergraduates, we had no  
171 problem prepping and running the library with what was provided with the MinION, we did find  
172 multiple problems while running the experiment.

173 We had difficulties with some of the basics such as opening the files, which are in .fast5  
174 format. HDFView by the HDF Group is a program that can open the files and will present the  
175 sequences in FASTA format which can be easily run through BLAST. Our main obstacle,  
176 however, was sorting through the raw data and identifying which sequences to BLAST. With  
177 computer science backgrounds, it's possible to tackle this problem, but as none of us had much  
178 experience with programming we had to look for alternatives. Beyond Metrichor, the MinION  
179 has a lot of user made programs, each with their own pros and cons, most notably Poretools (an  
180 extensive list by Next Gen Seek can be found in the references). Poretools is a toolkit that can be  
181 used to go through the large amount of raw data and sort the reads for easier analysis (Loman  
182 2014). This allows users who would like to view high quality sequences to access them quickly.

183 Metrichor, the analytical component of the MinION, can currently only recognize  
184 organisms such as bacteria. In identification of pupfish this makes the results from Metrichor less  
185 useful as a fish is a multicellular organism. We found it difficult to select high quality reads from  
186 the data we generated to BLAST as nanopore sequencing created such large amounts of data and  
187 currently has very little user friendly supporting programs for analysis. Luckily, currently Oxford  
188 Nanopore is working to continue developing Metrichor so it can search for more organisms from

189 the NCBI database which would resolve the current issue of identifying species from the data  
190 obtained. In the end, the easiest method for us was to use HDFView to open the files before  
191 using BLAST for individual sequences.

192 Another problem was that MinION flow cells are advertised to be able to run about three  
193 experiments each but active nanopores degrade rapidly, especially after the long runs needed for  
194 the experiments. In reality each flow cell can only handle one run, before too many nanopores  
195 become degraded. Originally, we had hoped to run more experimental runs, but the experience of  
196 the first failed runs taught us how to troubleshoot and improve our methods for the future as we  
197 had to go back and identify possible mistakes in our procedure that may have negatively  
198 impacted the accuracy of our results. We learned how to identify possible problems that occurred  
199 during the experiment and how to avoid those factors in the final experimental run.

200 Nanopore sequencing can be an incredibly useful educational tool. It brings a portable,  
201 user-friendly technology to students and can introduce students of various backgrounds and  
202 experience to modern molecular biology. Courses dedicated to exploring nanopore sequencing as  
203 a tool for genomic sequencing have many options to choose from. Undergraduate classes can  
204 choose to focus on bacterial genomes until WIMP is further updated to include other taxa.  
205 Nanopore sequencing can also be used to identify unknown samples and introduce students to  
206 how to use tools such as BLAST for identifying organisms from nucleotide sequences. This  
207 technology is not necessarily even limited to college classrooms, as there have already been  
208 workshops promoting interest in science for young girls that use similar portable DNA  
209 identification technologies to great effect (Chacon-Heszele 2016). The ease of access nanopore  
210 sequencing offers to the field is also its strength for education as it provides students with an  
211 opportunity to witness easier to access and use technologies.

212           There have been other courses that have also explored aspects of nanopore sequencing as  
213 well. Most notably, Columbia University offered a 13-week course that introduced students to  
214 the MinION in hackathon sessions which allowed students to generate DNA sequences and use  
215 them to identify unknown species or human DNA (Zaaijer 2016). Another example occurred  
216 near Acadia National Park in Maine, where researchers trained high school students during the  
217 summer to help them sequence samples collected from the park (Krol 2015). There are various  
218 ways in which nanopore sequencing can be used in an educational context, and with its lower  
219 cost in comparison to other genetic sequencing alternatives and mobile capability it opens the  
220 doors for students to experience sequencing on the field.

221

222 *Possible lesson plans:*

223 *WIMP:*

224 Metrichor's What's In My Pot application offers a large variety of options students can explore.  
225 One activity students can do is to take environmental swabs of various locations and identify  
226 which organisms they find in their samples. Students can choose locations that interest them,  
227 such as public transportation, bathrooms, or water from local streams. They can take their  
228 samples and purify and extract DNA. Using nanopore sequencing to read their DNA they can  
229 then analyze and identify which bacterial species they found in their samples using WIMP.  
230 However, until WIMP's database is updated, the species that can be identified will be limited to  
231 bacterial and fungal.

232

233 *Identification of an unknown sample:*

234 Students can also use nanopore sequencing as a tool to determine the identity of an unknown  
235 sample. Students may be interested in identifying the ingredients of the food they normally  
236 consume or teachers could set up a more structured lab for students to identify various samples.  
237 For example, if students were interested in figuring out which type of fish were used in their  
238 sushi, they could use nanopore sequencing to identify the extracted DNA from a slice of sashimi.  
239 Alternatively, teachers could prepare samples of DNA and have students identify which  
240 unknown organism they were given.

241

242 *De novo genome assembly:*

243 As a third generation sequencing technology, nanopore sequencing is also entirely capable of  
244 generating incredibly long reads that are necessary for genome assembly. This approach would  
245 require some experience with genome assembly. Students could use results from nanopore  
246 sequencing and other sequencing methods to assemble the genome of a sample.

247

248 **Conclusion:**

249 We found nanopore sequencing to be an incredibly interesting path for our independent project  
250 and found that even with very little guidance beyond what is provided online that we could  
251 properly run the experiments. Although some basic knowledge of laboratory techniques is  
252 necessary, such as pipetting procedures and DNA extraction, the procedure itself for running  
253 nanopore sequencing is very straight forward. As we had very little computer science  
254 background, our main issue was actually analyzing the data we obtained.

255

256 **Methods:**

257 *DNA Extraction:*

258 The DNA sample was extracted using instructions provided in Qiagen's DNeasy Blood and  
259 Tissue Kit adapted to increase higher yields of long segments of DNA

260 *Materials:*

- 261 • Tissue sample
- 262 • 1.5 mL microcentrifuge tubes
- 263 • Centrifuge
- 264 • Buffer ATL
- 265 • Proteinase K
- 266 • Buffer AL
- 267 • 100% ethanol
- 268 • DNeasy Mini spin column and 2 mL collection tube
- 269 • Buffer AW1
- 270 • Buffer AW2
- 271 • Nuclease-free PCR water

- 272 1. Cut two pupfish filets into smaller pieces and add 180  $\mu$ L Buffer ATL and 20  $\mu$ L  
273 proteinase K.
- 274 2. Mix by inverting instead of vortexing to prevent DNA from fragmenting. Then incubate  
275 at 56 °C for 3 hours while periodically mixing the solution about every 15 minutes.
- 276 3. At the end of incubation period add 200  $\mu$ L Buffer AL and incubate for another 10  
277 minutes at 56°C
- 278 4. Add 200  $\mu$ L of 100% ethanol to extract the DNA and then pipet the solution into a  
279 DNeasy Mini spin column placed in a 2 mL collection tube. Centrifuge at 8000 rpm for  
280 one minute and discard the flow through.
- 281 5. Place the spin column into a new 2 mL collection tube and add 700 Buffer AW1 for the  
282 first wash. Repeat the centrifugation step at 8000 rpm for five minutes.
- 283 6. Place the spin column into another new 2 mL collection tube and wash with 700 $\mu$ L  
284 Buffer AW2. Centrifuge at 14,000 rpm for ten minutes. Repeat this step.  
285

286 7. Elute the DNA by adding 200  $\mu$ L of Nuclease-free PCR grade water heated up to 55  $^{\circ}$ C to  
287 the center of the spin column membrane. Incubate for 1 minute at room temperature then  
288 centrifuge at 8000 rpm for one minute. Repeat this step to increase DNA yield.

289

290 *Quality Check of Extracted DNA:*

291 Analyze the samples of extracted DNA from pupfish filets to make sure they meet minimum  
292 quality requirements for nanopore analysis.

293 a. Use 1  $\mu$ L of the samples for nanodrop analysis. Check to make sure that the purity  
294 is at least 1.8 from Nanodrop OD 260/280 and 2.0-2.2 from Nanodrop OD  
295 260/230.

296 b. Prepare a 1% agarose gel mixture by adding 1 g of agarose powder for every 100  
297 mL of TAE mixture. Mix and microwave at 1 minute intervals for a total of 3  
298 minutes. Allow the gel mixture to cool and then pour into a gel mold and insert a  
299 gel comb. Wait for 30 minutes to let gel solidify. Mix 2  $\mu$ L of the sample and 2  
300  $\mu$ L of ethidium bromide dye. Load 2  $\mu$ L of the sample and a DNA ladder into the  
301 gel. Check that the average size is greater than 30 kb.

302 c. Analyze the sample by Qubit by setting up array tubes for two standards and for  
303 each of the samples. Prepare the standards by adding 190  $\mu$ L of Qubit buffer and  
304 10  $\mu$ L of either standard 1 or 2. Prepare the samples by adding 198  $\mu$ L of Qubit  
305 buffer and 2  $\mu$ L of sample. vortex the solutions for ten seconds before incubating  
306 at room temperature for two minutes. Calibrate the machine with the standards  
307 before inserting samples. Dilute the sample to 200 ng per 7.5  $\mu$ L by using the  
308 concentration measured by Qubit.

309

310

311 *MinION Rapid Sequencing Kit:*

312 The method was adapted from Oxford Nanopore Technologies protocol for the Rapid

313 Sequencing of genomic DNA for the MinION.

314 *Materials:*

- 315 • 1.5 mL microcentrifuge tubes
- 316 • 0.2 mL PCR tubes
- 317 • Centrifuge
- 318 • MinION
- 319 • MinION flow cell
- 320 • Computer
- 321 • 200 ng high molecular weight DNA
- 322 • Lambda control DNA
- 323 • Nuclease free water
- 324 • FRM
- 325 • RAD
- 326 • NEB Blunt/TA Ligase Master Mix
- 327 • RBF-1

328

329 1. Prepare the library in the concentrations as shown in Table 1.

| Reagent             | Control     | Sample      |
|---------------------|-------------|-------------|
| 200 ng HMW DNA      | -           | 7.5 $\mu$ L |
| Lambda control DNA  | 4.0 $\mu$ L | -           |
| FRM                 | 2.5 $\mu$ L | 2.5 $\mu$ L |
| Nuclease-free water | 3.5 $\mu$ L | -           |
| Total               | 10 $\mu$ L  | 10 L        |

330

331 2. Incubate at 30°C for one minute then at 75°C for one minute and spin down in a centrifuge.

332 3. Add 1  $\mu$ L RAD, the provided adapter and 0.5  $\mu$ L Blunt/TA Ligase Master Mix and incubate

333 for 5 minutes at room temperature. Place the solution on ice until the prepared library is

- 334 ready to be loaded into the MinION flow cell. This step fragments the DNA and adds an  
335 adapter that can be recognized by the nanopores on the MinION flow cell.
- 336 4. Assemble the MinION by inserting the MinION flow cell into the MinION and preform a  
337 QC run to check the number of active pores.
- 338
- 339 5. Prepare the priming buffer by adding 500  $\mu$ L RBF1 and 500  $\mu$ L of nuclease free water into a  
340 1.5 mL micro centrifuge tube. Draw back a few  $\mu$ LS of buffer from the sample port to  
341 remove air bubbles. Load the priming buffer in ten minute intervals into the sample port.
- 342 6. Prepare the library for loading by adding 38  $\mu$ L of RBF1 and 32  $\mu$ L of nuclease free water at  
343 room temperature into a 1.5 mL micro centrifuge tube. Add 6  $\mu$ L adapted and tethered  
344 library and spin down.
- 345 7. Load 75  $\mu$ L of the sample into the flow cell one drop at a time through the SpotON port  
346 under the activator.
- 347 8. Load the program through MinKNOW, a software provided for the MinION. MinKNOW  
348 should be able to provide data in real time before it can be uploaded and analyzed using  
349 Metrichor. Metrichor can check the quality of the DNA sequencing and currently can  
350 provide identification of unicellular organisms in the solution.
- 351 9. Use the Basic Local Alignment Search Tool (BLAST) by the National Center for  
352 Biotechnology Information to compare raw DNA sequences collected by MinION to known  
353 genome sequences if necessary. The raw data may be accessed from the run by opening the  
354 folder that MinKNOW generates for the run. To manually view the files, which are in .fast5  
355 format, will require a program such as HDFView to open and convert into FASTA format.<sup>20</sup>  
356 The nucleotide sequence in FASTA format can be imported or copied into BLAST and the  
357 sequence will be searched against the database. There are alternative methods such as using



358 a user-created program called Poretools which can sort through the raw data and present it in  
359 a readable format. However, as it requires some computer science background to be able to  
360 use it, our group took 10 random files from the database generated and used HDFView to  
361 open the sequences. These 10 random files were then individually entered into BLAST and  
362 their results recorded.

363

#### 364 **Ethics approval and consent to participate**

365 Not applicable.

366

#### 367 **Consent for publication**

368 All authors have consented to submitting this version of the manuscript for publication.

369

#### 370 **Availability of data and material**

371 Raw sequence reads resulting from Oxford Nanopore runs will be uploaded to NCBI's Short  
372 Read Archive. Sequences used for BLAST searches will be provided as supplemental data.

373

#### 374 **Competing interests**

375 The authors declare that they have no competing interests.

376

#### 377 **Author contributions**

378 YZ prepared genomic libraries, ran the sequencing machine, wrote the manuscript, and analyzed  
379 the data. CHM provided funding for the study and contributed to revision of the manuscript.

380

---

381 **Acknowledgements**

382 University of North Carolina at Chapel Hill's Quality Enhancement Program provided funding  
383 for this research to improve student learning outcomes in a research-based undergraduate course  
384 (CURE). We thank co-instructor J Bruno for his openness to including nanopore sequencing  
385 within the scope of his seafood forensics lab course. We thank YZ's classmates for their  
386 contributions to this project. Permission to collect the pupfish specimen was provided by the  
387 Bahamas BEST commission and all animal procedures (breeding and euthanasia) followed  
388 approved animal care protocol 15-179.0 from UNC's Animal Care and Use Committee.

389

390 **References:**

- 
- 391 1. Branton, D., Deamer, D. W., Marziali, A., Bayley, H., Benner S. A., Butler, T., Di  
392 Ventra, M., Garaj, S., Hibbs, A., Huang, X., Jovanovich, S. B., Krstic, P. S.,  
393 Lindsay, S., Ling, X. S., Mastrangelo, C. H., Meller, A., Oliver, J. S., Pershin, Y.  
394 V., Ramsey, J. M., Riehn, R., Soni, G. V., Tabard-Cossa, V., Wanunu, M.,  
395 Wiggin, M., and Schloss, J. A. (2008). The potential and challenges of nanopore  
396 sequencing, *Nature Biotechnology*, 26: 1146-1153.  
397
- 398 2. Chacon-Heszele, M. (2016). TechGirlz Take on Food Science. *Biomeme*  
399
- 400 3. Clarke, J., Wu, H., Jayasinghe, L., Patel, A., Reid, S., & Bayley, H. (2009). Continuous  
401 base identification for single-molecule nanopore DNA sequencing. *Nature*  
402 *Nanotechnology*, 4, 265–270.  
403
- 404 4. Deamer, D., Akeson, M., and Branton, D. (2016). Three decades of nanopore sequencing.  
405 *Nature Biotechnology*, 34: 518-524.  
406
- 407 5. Goodwin, S., McPherson, J. D., & McCombie, R. (2016). Coming of age: ten years of  
408 next-generation sequencing technologies. *Nature Reviews: Genetics*, 17, 333–351.  
409
- 410 6. Jain, M., Olsen, H., Paten, B., and Akeson, M. (2016). The Oxford Nanopore MinION:  
411 delivery of nanopore sequencing to the genomics community. *Genome Biology*,  
412 17: 239.  
413
- 414 7. Krol, A. (2015). Citizen Sequencers: Taking Oxford Nanopore's MinION to the  
415 Classroom and Beyond. *BioIT World*  
416

- 417 8. Lee, H., Gurtowski, J., Yoo, S., Nattestad, M., Marcus, S., Goodwin, S., McCombie, R.,  
418 et al. (2016). Third-generation sequencing and the future of genomics. *bioRxiv*.  
419
- 420 9. Loman, N. J., & Quinlan, A. R. (2014). Poretools: a toolkit for analyzing nanopore  
421 sequence data. *Bioinformatics*, 30(23), 3399–3401.  
422
- 423 10. Martin, C., Wainwright, P. (2013). A Remarkable Species Flock of *Cyprinodon*  
424 Puffishes Endemic to San Salvador Island, Bahamas. *Bulletin of the Peabody*  
425 *Museum of Natural History*, 54: 231-240.  
426
- 427 11. Meller, A., Nivon, L., Brandin, E., Golovchenko, J., and Branton, D. (2000). Rapid  
428 nanopore discrimination between single polynucleotide molecules. *Proceedings of*  
429 *the National Academy of Sciences of the United States of America*, 97: 1079-1084.  
430
- 431 12. Morozova, O., & Marra, M. (2008). Applications of next-generation sequencing  
432 technologies in functional genomics. *ScienceDirect*, 92(5), 255–264.  
433
- 434 13. McGirr JA, Martin CH. (2017) Novel candidate genes underlying extreme trophic  
435 specialization in Caribbean pupfishes. *Molecular Biology and Evolution*.  
436 [doi:10.1093/molbev/msw286](https://doi.org/10.1093/molbev/msw286)  
437
- 438 14. Martin CH, Erickson PA, Miller CT (2016) The genetic architecture of novel trophic  
439 specialists: higher effect sizes are associated with exceptional oral jaw diversification in  
440 a pupfish adaptive radiation. *Molecular Ecology*.  
441
- 442 15. Martin CH. (2016a) The cryptic origins of evolutionary novelty: 1,000-fold-faster trophic  
443 diversification rates without increased ecological opportunity or hybrid swarm. *Evolution*  
444 70:2504-2519.  
445
- 446 16. Martin CH. (2016b) Context dependence in complex adaptive landscapes: frequency and  
447 trait-dependent selection surfaces within an adaptive radiation of Caribbean  
448 pupfishes. *Evolution* 70:1265-1282.  
449
- 450 17. Martin CH, Wainwright PC. (2013a) A remarkable species flock of *Cyprinodon*  
451 pupfishes endemic to San Salvador Island, Bahamas. *Bulletin of the Peabody Museum of*  
452 *Natural History*. 54:231-240.  
453
- 454 18. Martin CH, Wainwright PC. (2013b) On the measurement of ecological novelty: scale-  
455 eating pupfish are separated by 168 my from other scale-eating fishes. *PLOS One*.  
456 8:e71164.  
457
- 458 19. Martin CH, Wainwright PC. (2011) Trophic novelty is linked to exceptional rates of  
459 morphological diversification in two adaptive radiations of *Cyprinodon* pupfish.  
460 *Evolution*. 65:2197-2212.  
461

- 462 20. Richards EJ, Martin CH. 2017. Adaptive introgression from distant Caribbean islands  
463 contributed to the diversification of a micro-endemic adaptive radiation of trophic  
464 specialist pupfishes. *PLOS Genetics*. In press. biorxiv doi:  
465 <https://doi.org/10.1101/115055>.  
466
- 467 21. Next Gen Seek. (2015). Software tools for Oxford Nanopore sequence data. Retrieved  
468 from [http://nextgenseek.com/2015/10/software-tools-for-oxford-nanopore-](http://nextgenseek.com/2015/10/software-tools-for-oxford-nanopore-sequence-data/)  
469 [sequence-data/](http://nextgenseek.com/2015/10/software-tools-for-oxford-nanopore-sequence-data/)  
470
- 471 22. Obenrader, S. (2003). The Sanger Method, Dept. of Biology, Davidson College.  
472 Retrieved from  
473 [http://www.bio.davidson.edu/Courses/Molbio/MolStudents/spring2003/Obenrade](http://www.bio.davidson.edu/Courses/Molbio/MolStudents/spring2003/Obenrader/sanger_method_page.htm)  
474 [r/sanger\\_method\\_page.htm](http://www.bio.davidson.edu/Courses/Molbio/MolStudents/spring2003/Obenrader/sanger_method_page.htm)  
475
- 476 23. Oxford Nanopore Technologies. (2017). MinION software (MinKNOW) upgraded to  
477 enable increased data yield, other benefits. Retrieved from  
478 [https://nanoporetech.com/about-us/news/minion-software-minknow-upgraded-](https://nanoporetech.com/about-us/news/minion-software-minknow-upgraded-enable-increased-data-yield-other-benefits)  
479 [enable-increased-data-yield-other-benefits](https://nanoporetech.com/about-us/news/minion-software-minknow-upgraded-enable-increased-data-yield-other-benefits)  
480
- 481 24. Quick, J., Loman, N. J., Duraffour, S., Simpson, J. T., Severi, E., Cowley, L., Bore, J. A.,  
482 et al. (2016). Real-time, portable genome sequencing for Ebola surveillance.  
483 *Nature*, 530, 228–232.  
484
- 485 25. Schmidt, K. J., Mwaigwisya, S. R., Crossman, L. C., & Doumith, M. (2017).  
486 Identification of bacterial pathogens and antimicrobial resistance directly from  
487 clinical urines by nanopore-based metagenomic sequencing. *Journal of*  
488 *Antimicrobial Chemotherapy*, 71(1), 104–114.  
489
- 490 26. Shendure, J., and Ji, H. (2008). Next-generation DNA sequencing. *Nature Biotechnology*,  
491 26: 1135-1145.  
492
- 493 27. Zaaijer, S., & Erlich, Y. (2016). Cutting edge: Using mobile sequencers in an academic  
494 classroom. *eLife*, 5.  
495
- 496 28. WIMP plus 1D Basecalling for FLO-MIN105 250bps [Instance ID:127853], Metrichor,  
497 Oxford Nanopore Technologies.  
498
- 499 29. Adapted from Qiagen DNeasy Blood and Tissue Kit Quick-Start Protocol, QIAGEN,  
500 DNeasy, January 2011.  
501
- 502 30. Rapid Sequencing of genomic DNA for the MinION device using SQK-RAD001  
503 Oxford Nanopore Technologies, Retrieved from  
504 [https://community.nanoporetech.com/protocols/rapid-](https://community.nanoporetech.com/protocols/rapid-sequencing/v/res_9018_v7_revu_04jul2016-1731/checklist-protocol)  
505 [sequencing/v/res\\_9018\\_v7\\_revu\\_04jul2016-1731/checklist-protocol](https://community.nanoporetech.com/protocols/rapid-sequencing/v/res_9018_v7_revu_04jul2016-1731/checklist-protocol)  
506

507 31. HDFView v2.1.3.0. The HDF Group

508  
509  
510  
511  
512  
513  
514  
515  
516

517 **Table 1** Summary obtained from Metrichor of the run (Oxford Nanopore Technologies 2016).

518 Total results were from all the reads obtained during the run, while filtered results are reads that  
519 passed a quality score in MinKNOW. QScore is the quality score assigned to the runs.

520

|                           | <b>Total</b>   | <b>Filtered</b> |
|---------------------------|----------------|-----------------|
| Read Count                | 38916          | 38858           |
| Total Yield               | 105.25 M Bases | 101.93 M Bases  |
| Sequence Length - Average | 2.71 K bases   | 2.62 K bases    |
| Sequence Length - Median  | 1.81 K bases   | 1.81 K bases    |
| Sequence Length - Mode    | 756.00 bases   | 756.00 bases    |
| Longest Read              | 169.96 K bases | 22.59 K bases   |
| QScore - Average          | 6.8            | 6.8             |
| QScore - Median           | 7.0            | 7.0             |
| QScore - Mode             | 7.6            | 7.6             |

521  
522  
523

**Table 2:** Active Pores Across Runs

|                           | Run              | Total Active Pores |
|---------------------------|------------------|--------------------|
| 1 <sup>st</sup> Flow Cell | Initial QC Check | 669                |
|                           | Control Run      | 624                |
|                           | Exp. Run 1       | 67                 |
| 2 <sup>nd</sup> Flow Cell | Exp. Run 2       | 750                |

524  
525  
526  
527

528  
529  
530  
531  
532  
533  
534  
535

**Figure 1** DNA sequence length versus accuracy of the read.

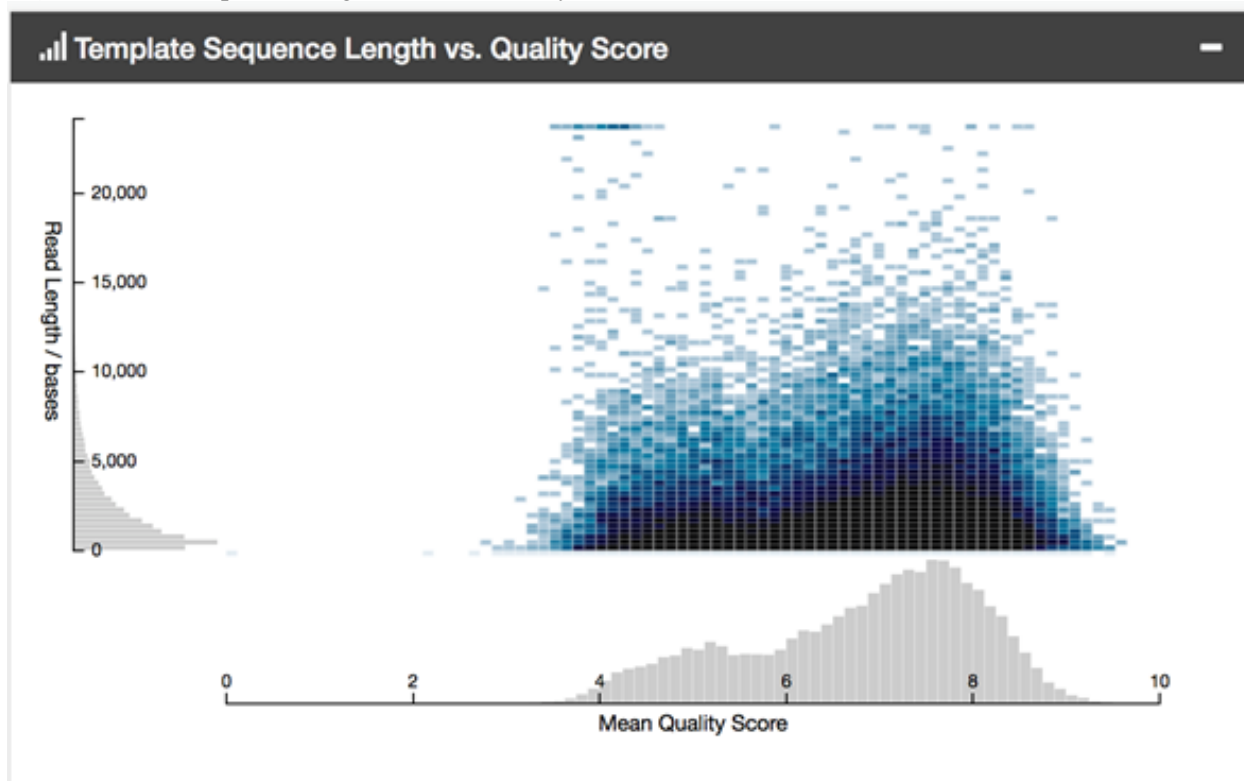

536  
537  
538  
539  
540  
541  
542  
543  
544  
545  
546  
547  
548  
549  
550  
551  
552

553  
554  
555  
556  
557  
558  
559  
560

**Figure 2** Accuracy of the read versus run time.

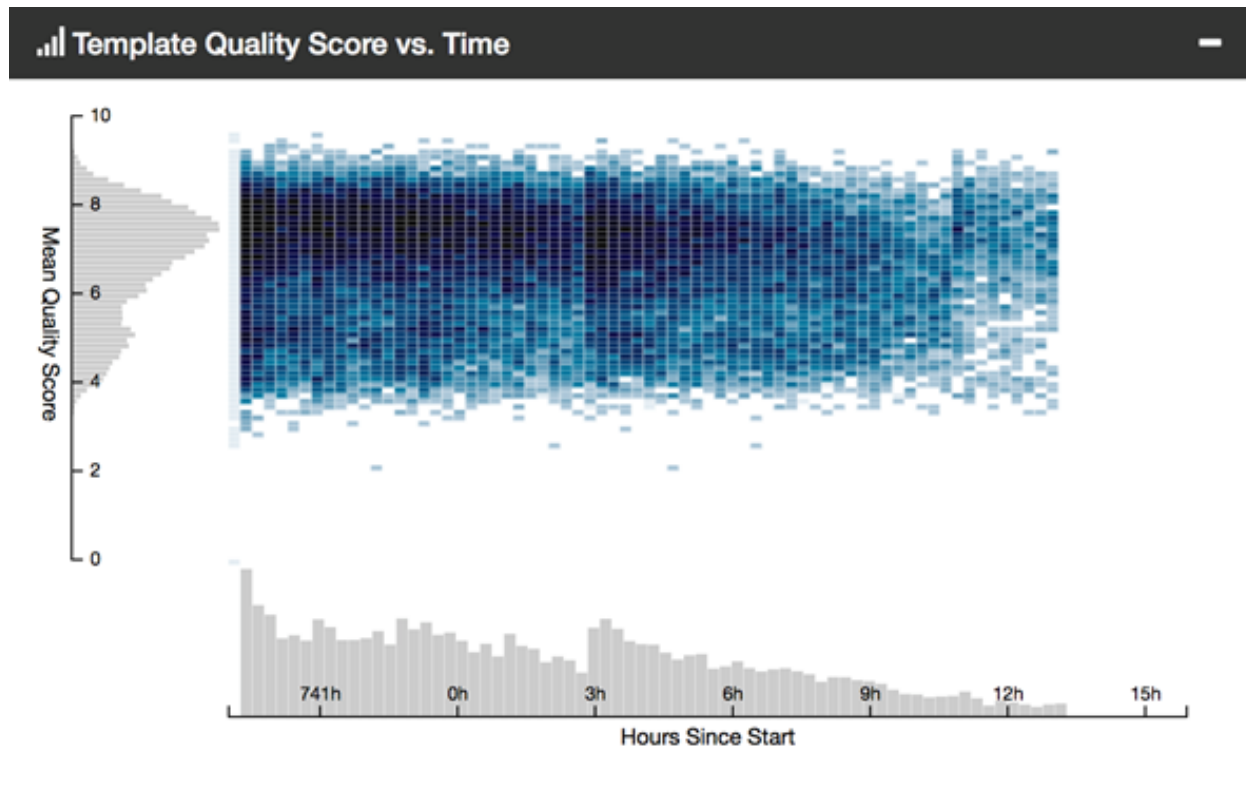

561  
562  
563  
564  
565  
566  
567  
568  
569  
570  
571

**Appendix 1:**

During the seafood forensics course students were first taught how to use pipettes to transfer small amounts of liquid and how to extract DNA from raw fish samples using Qiagen DNeasy Blood and Tissue Kit Quick-Start Protocol. Afterwards we checked to make sure the DNA met the quality requirements of Oxford Nanopore Technologies Rapid Sequencing Kit using

572 nanodrop to check the quality and quantity and gel electrophoresis to insure the fragments were  
573 mostly over 30 kb.

574 In total, we had time to run three experiments. The MinION comes with two flow cells,  
575 supposedly capable of running three samples each for a total of six experiments. For the first  
576 flow cell we completed two runs, one of a control DNA and one of our samples. The first run we  
577 did was the suggested control run using lambda DNA provided in the kit for the MinION that  
578 acquainted us with how to prepare and tagment DNA and how to prepare that library for loading  
579 into the machine. We also tried an experimental run but while running quality control counts of  
580 active nanopores on the flow cells we found that the most of the pores had degraded. As  
581 expected our first experimental run using pupfish DNA failed, however interestingly enough the  
582 control run also failed.

583 MinKNOW can provide data in real time although the sample runs take about 48 hours to  
584 complete. Within the first half hour there was already a lot of data displayed on the automatically  
585 updating charts. MinKNOW is a fairly straight forward program where all the user has to do is  
586 enter the flow-cell id, an identifier for the experiment run, and to choose whether they are  
587 running the control experiment or a sample experiment. The data is also updated to Metrichor  
588 where it can be analyzed.

589 The data generated from Metrichor indicates that all the reads collected from both our  
590 control and the first experimental run failed minimum quality filters that indicate how confident  
591 the program is in the accuracy of the sequence reads. We attempted to troubleshoot what may  
592 have gone wrong. After carefully rereading all the minimum quality requirements for the  
593 extracted DNA, we went back and double-checked the quality of the pupfish DNA using Qubit.  
594 Here we noticed that we did not dilute the experimental DNA to the proper concentration. After



595 diluting the sample to the proper concentration, we decided to use a fresh flow cell as the drastic  
596 decrease in active pores in the previous experimental run indicated less nanopore activity.  
597 However, as the control run also failed to meet minimum quality filters, we decided to also  
598 increase the attention to detail in preparation of the library for loading into the flow cell. We took  
599 extra care with pipetting small amounts of reagents and also used a centrifuge to insure the  
600 solution was completely mixed. . This run ended up successful and generated massive amounts  
601 of data. Metrichor can track the quality of the reads and record the length of each sequence over  
602 time

603 We also needed to use BLAST to identify random sequences we pulled from the folder  
604 MinKNOW indicated passed minimum quality filters to see what we could identify as Metrichor  
605 could not identify fish yet. HDFView is a free program that can open the fast5 format  
606 MinKNOW saves the sequencing reads in so we used it to analyze a hundred sequences. Then  
607 we took the nucleotide sequences and used NCBI's BLAST tool to see what matched up and the  
608 quality of the matches (See Appendix 1).

609

| Name                                                                                                    | Species common name      | E-Value |
|---------------------------------------------------------------------------------------------------------|--------------------------|---------|
| PREDICTED: Cyprinodon variegatus protein tyrosine phosphatase, receptor type R (ptpr), mRNA             | Sheepshead pupfish       | 0.0     |
| PREDICTED: Cyprinodon variegatus threonine synthase like 1 (thns1), mRNA                                | Sheepshead pupfish       | 0.0     |
| PREDICTED: Cyprinodon variegatus vasoactive intestinal polypeptide receptor 2-like (LOC107100610), mRNA | Sheepshead pupfish       | 0.0     |
| PREDICTED: Cyprinodon variegatus glutamate decarboxylase 1 (gad1), transcript variant X2, mRNA          | Sheepshead pupfish       | 0.0     |
| PREDICTED: Cyprinodon variegatus KIAA0040 ortholog (kiaa0040), mRNA                                     | Sheepshead pupfish       | 0.0     |
| Tetraodon nigroviridis transposon Titof2_Tet                                                            | Green spotted puffer     | 0.0     |
| Tetraodon nigroviridis transposon Titof2_Tet                                                            | Green spotted puffer     | 0.0     |
| Parodon nasus clone 1g transposon Tc1-Mariner, partial                                                  | A species of scrapetooth | 0.0     |

| sequence                                                                                                                          | fish                                                      |          |
|-----------------------------------------------------------------------------------------------------------------------------------|-----------------------------------------------------------|----------|
| Ctenopharyngodon idella clone GCFL-0405E6 MHC class I antigen (Citd-UBA) gene, complete cds; and tapasin (tpsn) gene, partial cds | Grass carp                                                | 0.0      |
| Ctenopharyngodon idella clone GCFL-0405E6 MHC class I antigen (Citd-UBA) gene, complete cds; and tapasin (tpsn) gene, partial cds | Grass carp                                                | 4.0E-170 |
| Takifugu rubripes scaffold_158 immunoglobulin light chain genomic sequence                                                        | Japanese puffer, Tiger puffer, or torafugu                | 5.0E-164 |
| Ophthalmotilapia nasuta voucher Matthew D. McGee:4400 ultra conserved element locus uce-466 genomic sequence                      | Gold Nasuta, Tiger Nasuta, or Long-Nosed Gold-Tip Cichlid | 7.0E-114 |
| PREDICTED: Cyprinodon variegatus p21 protein (Cdc42/Rac)-activated kinase 7 (pak7), transcript variant X4, mRNA                   | Sheepshead pupfish                                        | 8.0E-114 |
| PREDICTED: Cyprinodon variegatus plasma membrane calcium-transporting ATPase 1-like (LOC107083200), mRNA                          | Sheepshead pupfish                                        | 2.0E-94  |
| Cyprinus carpio genome assembly common carp genome ,scaffold 000001975                                                            | Common carp or European carp                              | 1.0E-85  |
| PREDICTED: Cyprinodon variegatus integrator complex subunit 2 (ints2), mRNA                                                       | Sheepshead pupfish                                        | 2.0E-84  |
| Cyprinus carpio genome assembly common carp genome, scaffold: LG33, chromosome: 33                                                | Common carp or European carp                              | 1.0E-79  |
| PREDICTED: Poecilia latipinna uncharacterized LOC106964528 (LOC106964528), ncRNA                                                  | Sailfin molly                                             | 6.0E-73  |
| PREDICTED: Cyprinodon variegatus uncharacterized LOC107086127 (LOC107086127), ncRNA                                               | Sheepshead pupfish                                        | 2.0E-68  |
| PREDICTED: Cyprinodon variegatus uncharacterized LOC107086655 (LOC107086655), mRNA                                                | Sheepshead pupfish                                        | 6.0E-54  |
| PREDICTED: Cyprinodon variegatus gastrula zinc finger protein XICGF57.1-like (LOC107092279), transcript variant X5, mRNA          | Sheepshead pupfish                                        | 2.0E-38  |
| PREDICTED: Cyprinodon variegatus ribonuclease inhibitor-like (LOC107080752), mRNA                                                 | Sheepshead pupfish                                        | 4.0E-35  |
| PREDICTED: Cyprinodon variegatus adenosine receptor A1-like (LOC107104125), mRNA                                                  | Sheepshead pupfish                                        | 9.0E-13  |
| PREDICTED: Poecilia reticulata spectrin beta chain, non-erythrocytic 4-like (LOC103476183), transcript variant X3, mRNA           | Guppy, millionfish, or rainbow fish                       | 1.7      |

610

611 **Table 3:** Identified fish sequences from one hundred random successful reads generated using nanopore  
 612 sequencing.

613

614 Out of one hundred samples searched, we found 24 reads matched any fish species. The most  
615 commonly identified species was that of the sheepshead pupfish, *Cyprinodon variegatus*, closely  
616 related to our sample tissue, *Cyprinodon brontotheroides* (which does not have any GenBank  
617 entries). Various bacteria were identified but with very high e-values. There was a single outlier  
618 of a sequence that identified as a wild boar that had an e-value of 4.0E-37.
